# Supplementary material for: GHG emission in cities, towns and rural areas
Source: Research Square preprint supplement (doi:10.21203/rs.3.rs-8405392/v1), 2026-01-18
Supplement: Supplementary file 1 [file 56dcf61883eb16c9c0426e7f.docx]

**Authors:** Crippa Monica1, Guizzardi Diego1, Pisoni Enrico1, Ciarlantini Sara2, Melchiorri Michele1, Schiavina Marcello3, Hormigos Feliu Clara1, Dijkstra Lewis1

1European Commission, Joint Research Centre (JRC), Ispra, Italy

2 Unisystems, Milan S.A, Italy

3NTT DATA, Rue de Spa 8, 1000 Brussels, Belgium

**Title:** GHG emission in cities, towns and rural areas

**Supplementary information**

**S.1 A fifth of global emissions occurs in urban centres**

Table S1 provides an overview of GHG emissions in the year 2024 by aggregated degree of urbanisation (cities, towns and semi-dense areas, and rural areas) by world region. Regional groupings are based on IPCC AR6 definition and include: Africa; Australia, Japan, and New Zealand; Eastern Asia; Eastern Europe and West-Central Asia; Europe; Latin America and Caribbean; Middle East; North America; South-East Asia and Pacific; Southern Asia (refer to Table S2). Globally around 21% of GHG emissions occurs in cities because a high fraction of global population (45%) lives there. However, depending on the country and region, this share spans from 13% (for North America) and 33% (for Australia, Japan, and New Zealand).

**Table S1 – GHG emissions by degree of urbanisation by world region. GHG emissions are ranked by decreasing GHG emissions in cities and are expressed in Gt CO2eq (using a Global Warming Potential for 100 years from IPCC AR5), while population is in million people. Only emissions from populated areas are included; emissions occurring over remote areas and sea (e.g. flaring overseas, coastal fishing, domestic shipping) and from international shipping and aviation are excluded. As a result, percentages may not sum to 100%.**

| **Region, year 2024** | **GHG emissions**  **(GtCO2eq), (%)** | | | **Population**  **(million people), (%)** | | |
| --- | --- | --- | --- | --- | --- | --- |
| **Cities** | **Towns and semi-dense areas** | **Rural areas** | **Cities** | **Towns and semi-dense areas** | **Rural areas** |
| World | 10.99 (21%) | 12.46 (24%) | 27.73 (53%) | 3,666 (45%) | 2,744 (33%) | 1,796 (22%) |
| Eastern Asia | 4.14 (25%) | 5.80  (35%) | 6.72 (40%) | 719 (47%) | 535  (35%) | 285 (19%) |
| Southern Asia | 1.41  (27%) | 2.10  (40%) | 1.71  (33%) | 806  (41%) | 841  (42%) | 337  (17%) |
| North America | 0.89 (13%) | 0.65  (10%) | 5.08  (76%) | 158  (41%) | 123  (32%) | 103 (27%) |
| Eastern Europe and West-Central Asia | 0.73  (20%) | 0.74  (20%) | 2.18  (59%) | 129  (44%) | 95  (33%) | 69  (24%) |
| Middle East | 0.73 (22%) | 0.58  (17%) | 1.79 (54%) | 178 (61%) | 68  (23%) | 46  (16%) |
| Europe | 0.69 (16%) | 0.80  (18%) | 2.82 (65%) | 265  (42%) | 187  (29%) | 183  (29%) |
| South-East Asia and Pacific | 0.68 (21%) | 0.88  (27%) | 1.64  (50%) | 319 (45%) | 239  (34%) | 154  (22%) |
| Africa | 0.64  (19%) | 0.41  (12%) | 2.19 (66%) | 626 (41%) | 464  (30%) | 447  (29%) |
| Australia, Japan, and New Zealand | 0.56  (33%) | 0.23  (13%) | 0.92  (53%) | 101  (66%) | 34  (22%) | 19  (12%) |
| Latin America and Caribbean | 0.52 (15%) | 0.28  (8%) | 2.67  (76%) | 364  (54%) | 158  (23%) | 153  (23%) |

**Table S2 – Definition of regional country aggregations.**

| **IPCC AR6 region** | **Countries** |
| --- | --- |
| **Africa** | Algeria; Angola; Benin; Botswana; Burkina Faso; Burundi; Cabo Verde; Cameroon; Central African Republic; Chad; Comoros; Congo; Côte d’Ivoire; Democratic Republic of the Congo; Djibouti; Egypt; Equatorial Guinea; Eritrea; Eswatini; Ethiopia; Gabon; Ghana; Guinea; Guinea-Bissau; Kenya; Lesotho; Liberia; Libya; Madagascar; Malawi; Mali; Mauritania; Mauritius; Morocco; Mozambique; Namibia; Niger; Nigeria; Rwanda; Réunion; Saint Helena, Ascension and Tristan da Cunha; Senegal; Seychelles; Sierra Leone; Somalia; South Africa; Sudan and South Sudan; São Tomé and Príncipe; Tanzania; The Gambia; Togo; Tunisia; Uganda; Western Sahara; Zambia; Zimbabwe. |
| **Australia, Japan, and New Zealand** | Australia; Japan; New Zealand. |
| **Eastern Asia** | China; Hong Kong; Macao; Mongolia; North Korea; South Korea; Taiwan. |
| **Eastern Europe and West-Central Asia** | Armenia; Azerbaijan; Belarus; Georgia; Kazakhstan; Kyrgyzstan; Moldova; Russia; Tajikistan; Turkmenistan; Ukraine; Uzbekistan. |
| **Europe** | Albania; Austria; Belgium; Bosnia and Herzegovina; Bulgaria; Croatia; Cyprus; Czechia; Denmark; Estonia; Faroes; Finland; France and Monaco; Germany; Gibraltar; Greece; Greenland; Hungary; Iceland; Ireland; Italy, San Marino and the Holy See; Latvia; Lithuania; Luxembourg; Malta; Netherlands; North Macedonia; Norway; Poland; Portugal; Romania; Serbia and Montenegro; Slovakia; Slovenia; Spain and Andorra; Sweden; Switzerland and Liechtenstein; Türkiye; United Kingdom. |
| **Latin America and Caribbean** | Anguilla; Antigua and Barbuda; Argentina; Aruba; Bahamas; Barbados; Belize; Bermuda; Bolivia; Brazil; British Virgin Islands; Cayman Islands; Chile; Colombia; Costa Rica; Cuba; Curaçao; Dominica; Dominican Republic; Ecuador; El Salvador; Falkland Islands; French Guiana; Grenada; Guadeloupe; Guatemala; Guyana; Haiti; Honduras; Jamaica; Martinique; Mexico; Nicaragua; Panama; Paraguay; Peru; Puerto Rico; Saint Kitts and Nevis; Saint Lucia; Saint Vincent and the Grenadines; Suriname; Trinidad and Tobago; Turks and Caicos Islands; Uruguay; Venezuela. |
| **Middle East** | Bahrain; Iran; Iraq; Israel and Palestine, State of; Jordan; Kuwait; Lebanon; Oman; Qatar; Saudi Arabia; Syria; United Arab Emirates; Yemen. |
| **North America** | Canada; Saint Pierre and Miquelon; United States. |
| **South-East Asia and Pacific** | Brunei; Cambodia; Cook Islands; Fiji; French Polynesia; Indonesia; Kiribati; Laos; Malaysia; Myanmar/Burma; New Caledonia; Palau; Papua New Guinea; Philippines; Samoa; Singapore; Solomon Islands; Thailand; Timor-Leste; Tonga; Vanuatu; Viet Nam. |
| **Southern Asia:** | Afghanistan; Bangladesh; Bhutan; India; Maldives; Nepal; Pakistan; Sri Lanka. |

**S.2 Sectoral contribution to the emissions**

**
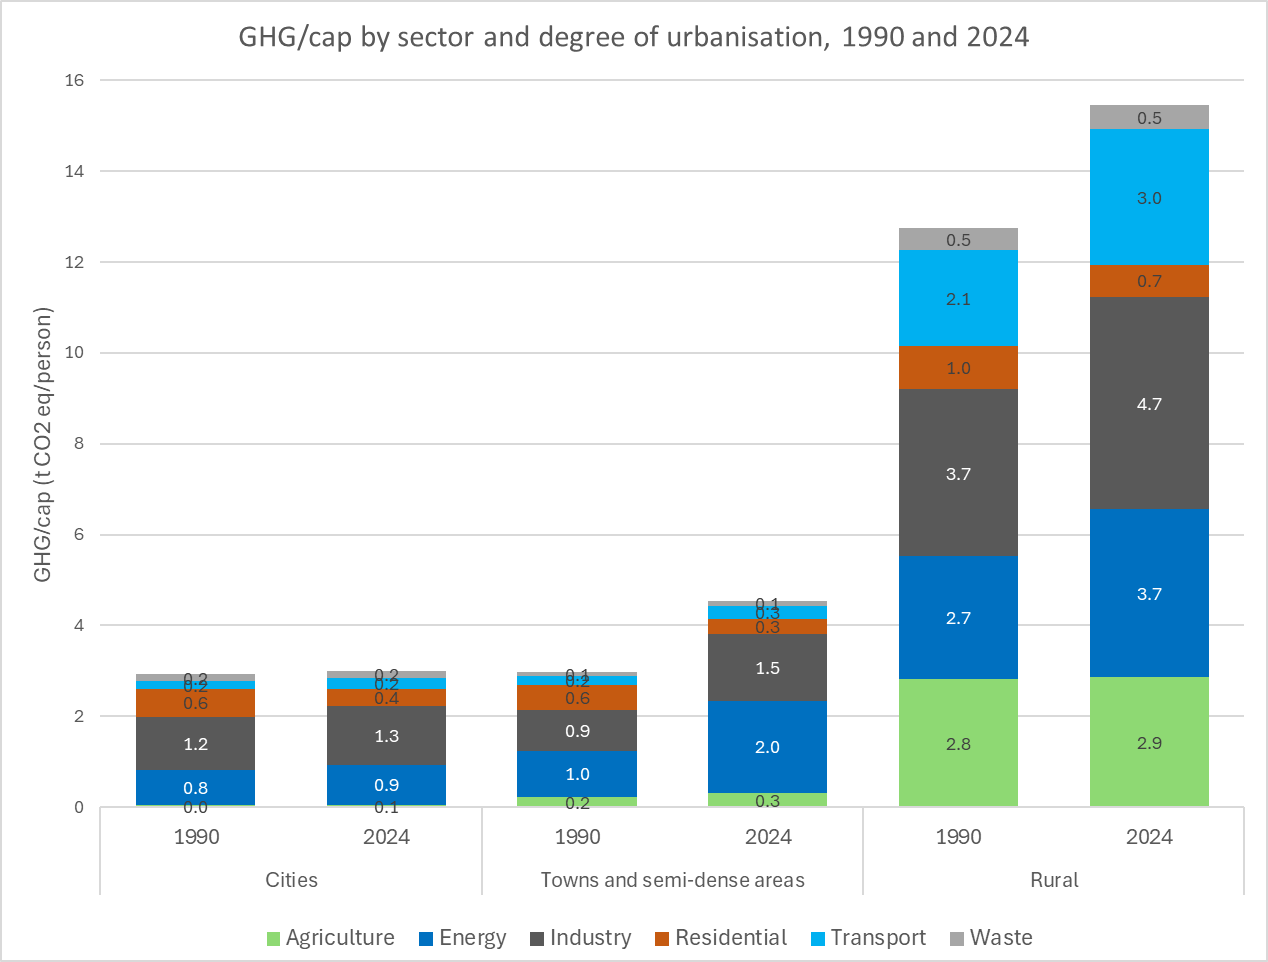
**

**Figure S1– Sectoral total GHG emissions per capita by degree of urbanisation over time.**

**S.3 Comparison of national and city patterns**

Cities with higher GHG emission per capita than national average are often affected by the presence of point sources, as shown in Fig. S2.


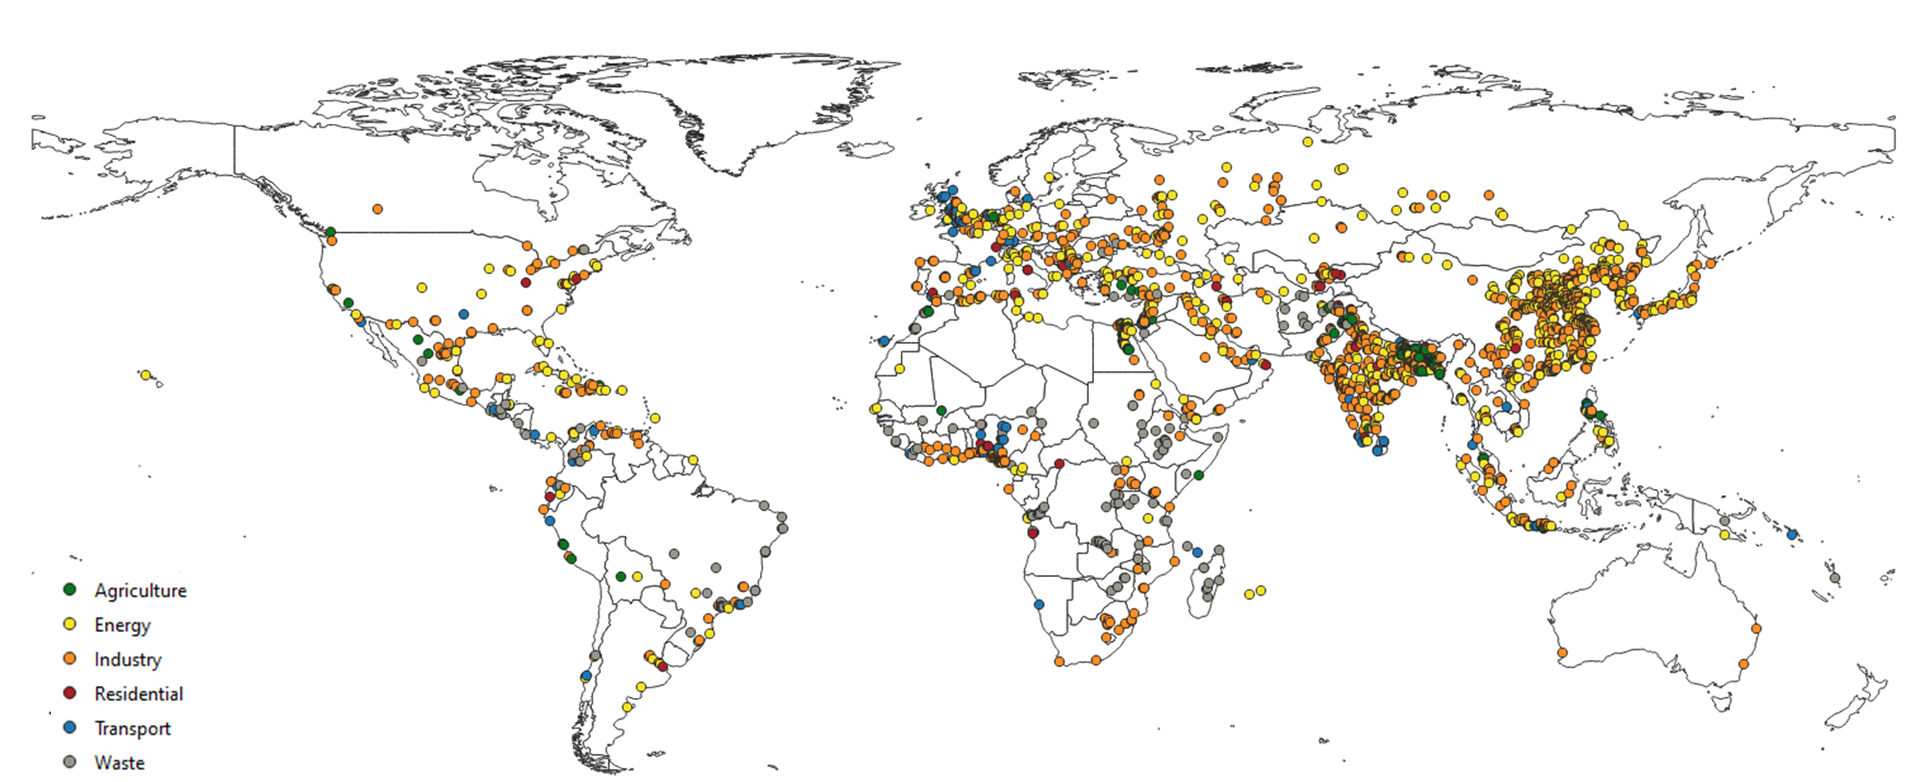


**Figure S2 – Cities with higher GHG emission per capita than national average are often affected by the presence of point sources.**

**Table S3 – Degree of urbanisation terms for the classification of grid cells and municipalities.**

| **Code level 1** | **Spatial unit terms level 1** | **Code level 2** | **Spatial unit terms level 2** |
| --- | --- | --- | --- |
| **3** | **City** | **30** | **City** |
| **2** | **Town and semi-dense area** | **23** | **Dense towns** |
| **22** | **Semi-dense town** |
| **21** | **Suburban or peri-urban area** |
| **1** | **Rural Area** | **13** | **Village** |
| **12** | **Dispersed rural area** |
| **11** | **Very dispersed rural area** |
